# Supplementary material
Source: ML conference proceedings conference paper supplement (https://openreview.net/forum?id=ZxQD6oYIOm)
Supplement: supplementary_material [file attachment]

# Supplementary Material

## 1. SUPPLEMENTARY RESULTS

| Source | Target | Avg Number of Ings Replaced |       |       |       | Percentage of Ings Replaced |          |         |           |
|--------|--------|-----------------------------|-------|-------|-------|-----------------------------|----------|---------|-----------|
|        |        | W2V                         | Mean  | CLS   | SBERT | W2V (%)                     | Mean (%) | CLS (%) | SBERT (%) |
| IT     | MEX    | 8.07                        | 11.00 | 9.17  | 9.17  | 71.09                       | 87.16    | 84.55   | 84.55     |
| IT     | CAN    | 7.76                        | 10.41 | 11.00 | 10.83 | 68.45                       | 89.44    | 90.40   | 90.40     |
| IT     | INSC   | 8.59                        | 1.08  | 1.14  | 1.14  | 75.58                       | 10.81    | 11.41   | 11.41     |
| IT     | SA     | 8.96                        | 7.58  | 7.65  | 7.64  | 79.10                       | 64.30    | 64.73   | 64.63     |
| MEX    | IT     | 8.01                        | 8.08  | 8.00  | 8.00  | 75.94                       | 90.40    | 91.11   | 91.11     |
| MEX    | CAN    | 6.99                        | 6.51  | 7.06  | 7.00  | 66.37                       | 74.07    | 75.96   | 75.76     |
| MEX    | INSC   | 7.55                        | 1.30  | 1.40  | 1.40  | 72.17                       | 14.40    | 14.72   | 14.72     |
| MEX    | SA     | 7.86                        | 5.96  | 6.03  | 6.03  | 74.84                       | 54.22    | 54.49   | 55.77     |
| CAN    | IT     | 6.67                        | 7.07  | 7.17  | 7.18  | 77.05                       | 82.94    | 83.73   | 83.72     |
| CAN    | MEX    | 6.86                        | 5.73  | 5.55  | 5.55  | 79.24                       | 82.95    | 85.10   | 85.10     |
| CAN    | INSC   | 7.71                        | 1.64  | 1.53  | 1.47  | 89.41                       | 21.08    | 20.47   | 19.34     |
| CAN    | SA     | 6.95                        | 5.65  | 5.77  | 5.83  | 80.37                       | 61.93    | 61.94   | 63.26     |
| INSC   | IT     | 11.31                       | 8.75  | 10.33 | 8.75  | 85.05                       | 97.50    | 96.67   | 97.50     |
| INSC   | MEX    | 10.66                       | 3.00  | 3.00  | 3.00  | 79.81                       | 75.00    | 75.00   | 75.00     |
| INSC   | CAN    | 10.42                       | 12.25 | 11.50 | 11.00 | 78.03                       | 90.63    | 90.87   | 86.93     |
| INSC   | SA     | 9.79                        | 10.60 | 10.58 | 10.57 | 73.37                       | 86.86    | 86.31   | 86.16     |
| SA     | IT     | 6.46                        | 9.18  | 8.56  | 9.80  | 80.79                       | 92.16    | 94.25   | 94.37     |
| SA     | MEX    | 6.67                        | 6.50  | 6.14  | 6.67  | 83.27                       | 88.45    | 88.10   | 94.44     |
| SA     | CAN    | 5.98                        | 4.98  | 4.97  | 4.91  | 73.92                       | 62.53    | 62.35   | 61.92     |
| SA     | INSC   | 6.29                        | 1.07  | 1.07  | 1.07  | 78.37                       | 17.24    | 17.24   | 17.24     |

**Table S1.** Number of ingredients replaced and percentage of ingredients replaced for different models.

## 2. SUPPLEMENTARY FIGURES

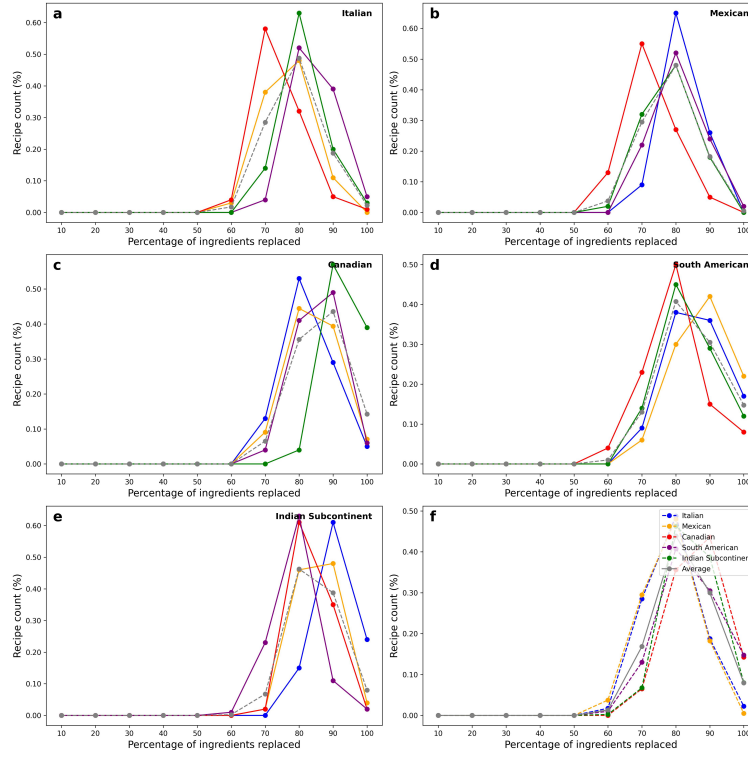

**Fig. S1.** Source Cuisine: Percentage of Ingredients Replaced v/s Normalized Recipe Count (Word2Vec)

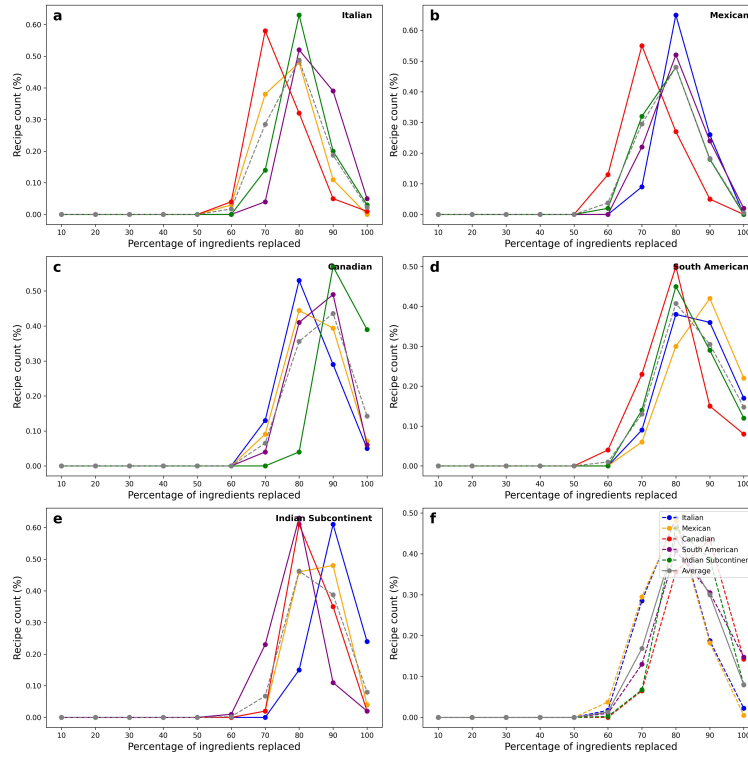

**Fig. S2.** Target Cuisine: Percentage of Ingredients Replaced v/s Normalized Recipe Count (Word2Vec)

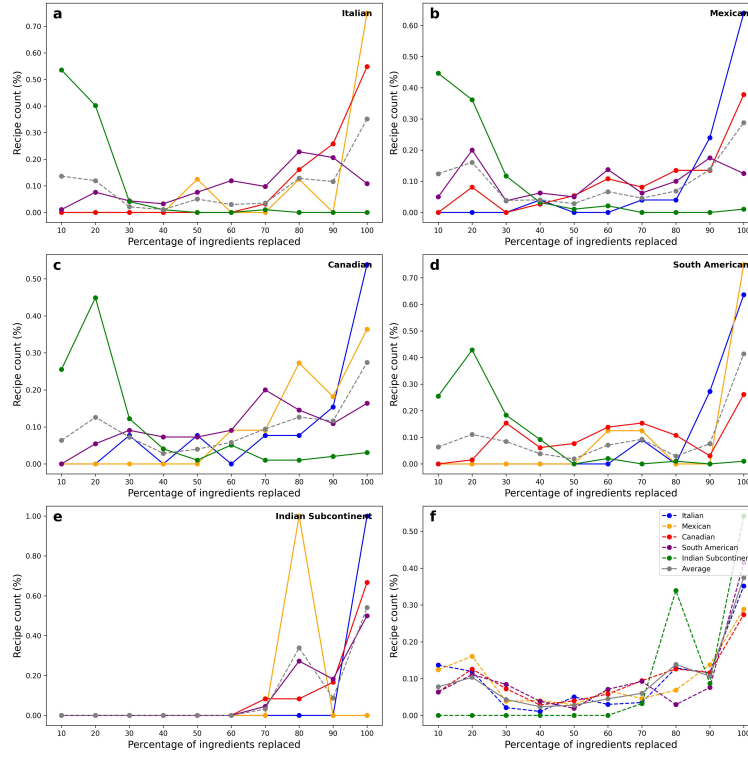

**Fig. S3.** Source Cuisine: Percentage of Ingredients Replaced v/s Normalized Recipe Count (Mean Pooling)

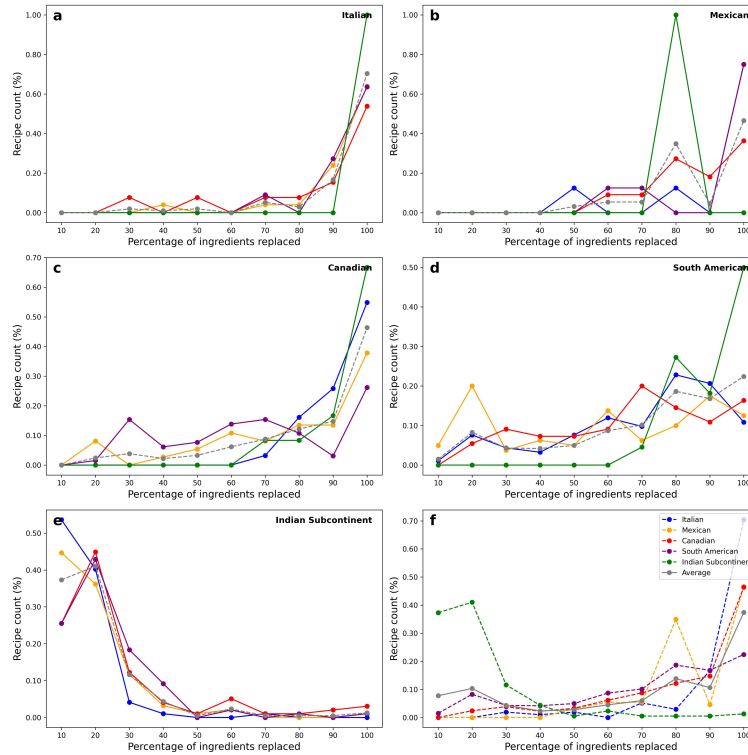

**Fig. S4.** Target Cuisine: Percentage of Ingredients Replaced v/s Normalized Recipe Count (Mean Pooling)

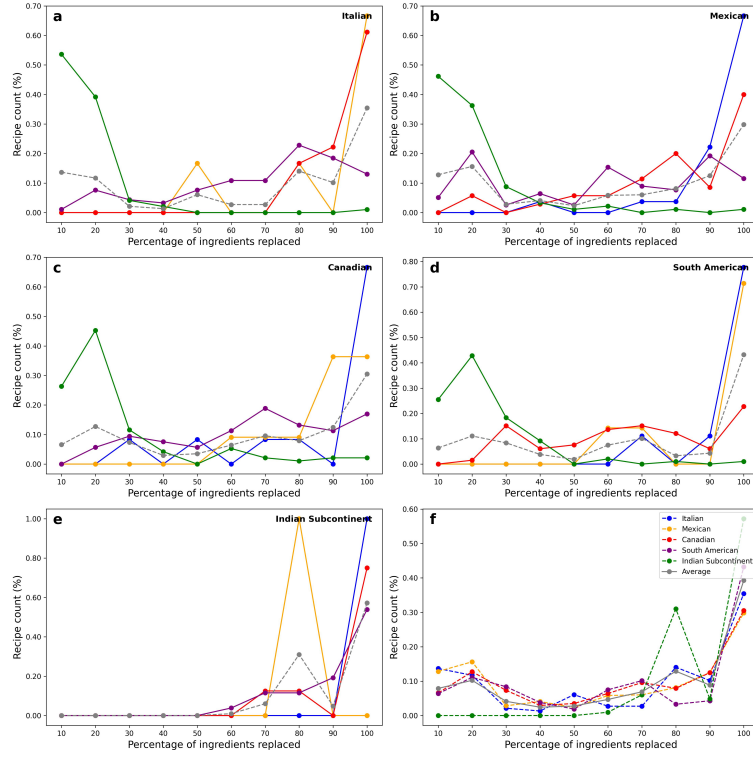

**Fig. S5.** Source Cuisine: Percentage of Ingredients Replaced v/s Normalized Recipe Count (CLS Pooling)

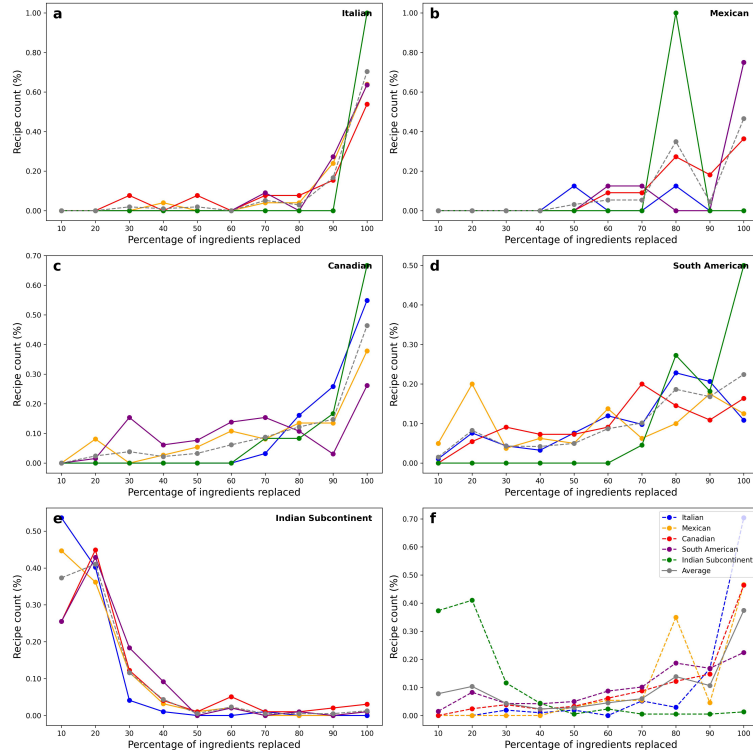

**Fig. S6.** Target Cuisine: Percentage of Ingredients Replaced v/s Normalized Recipe Count (CLS Pooling)



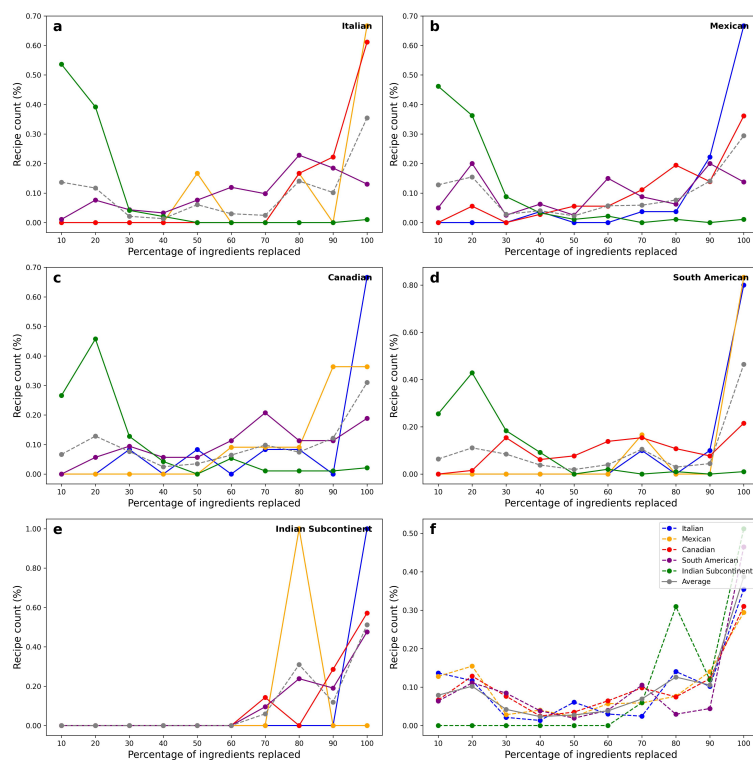

**Fig. S7.** Source Cuisine: Percentage of Ingredients Replaced v/s Normalized Recipe Count (SBERT)

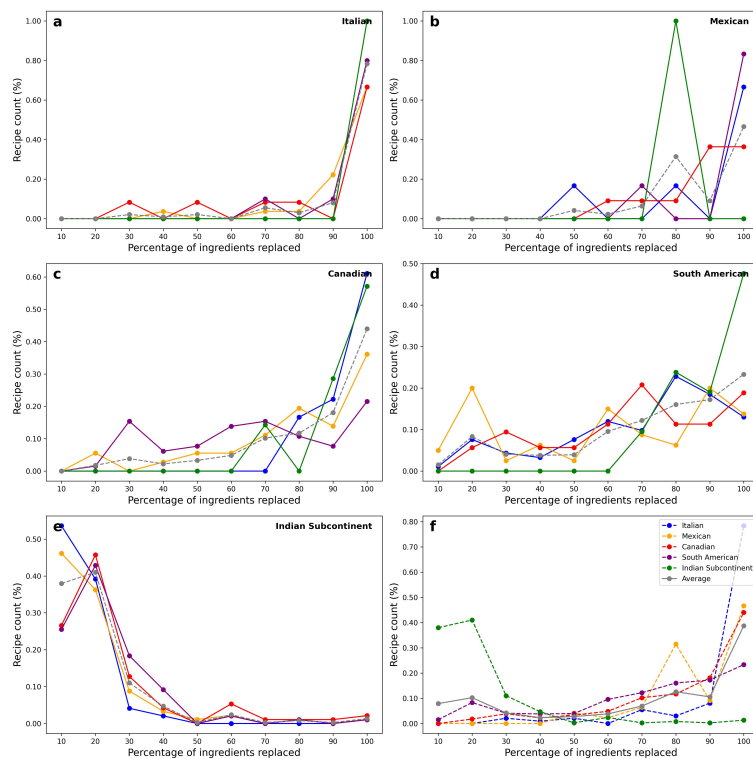

**Fig. S8.** Target Cuisine: Percentage of Ingredients Replaced v/s Normalized Recipe Count (SBERT)

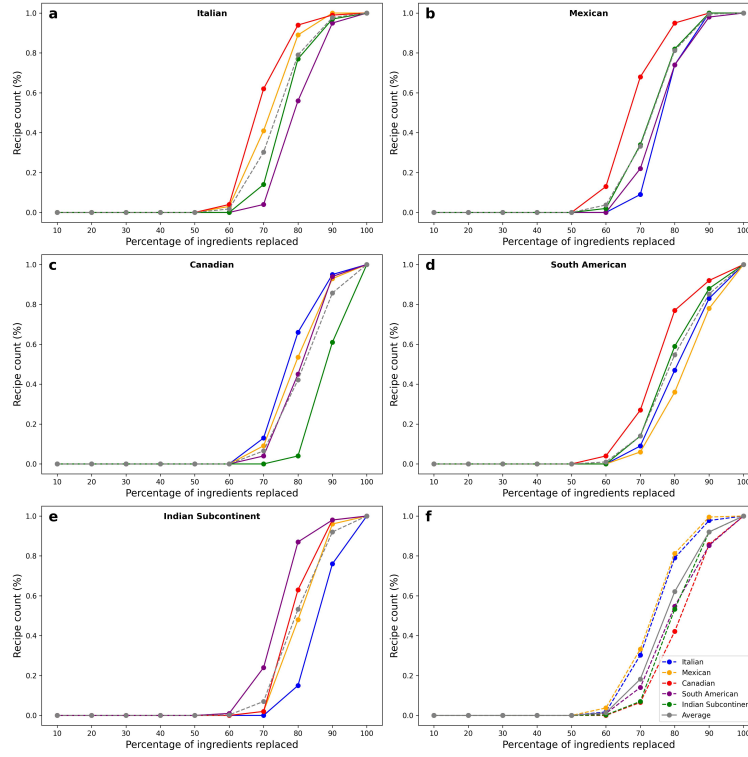

**Fig. S9.** Source Cuisine: Cumulative Percentage of Ingredients Replaced v/s Normalized Recipe Count (Word2Vec)

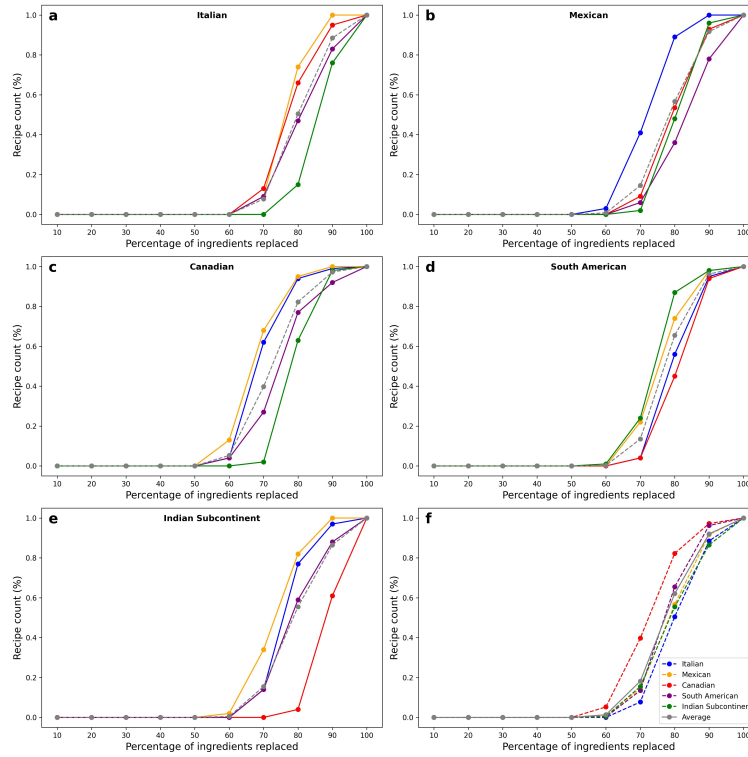

**Fig. S10.** Target Cuisine: Cumulative Percentage of Ingredients Replaced v/s Normalized Recipe Count (Word2Vec)

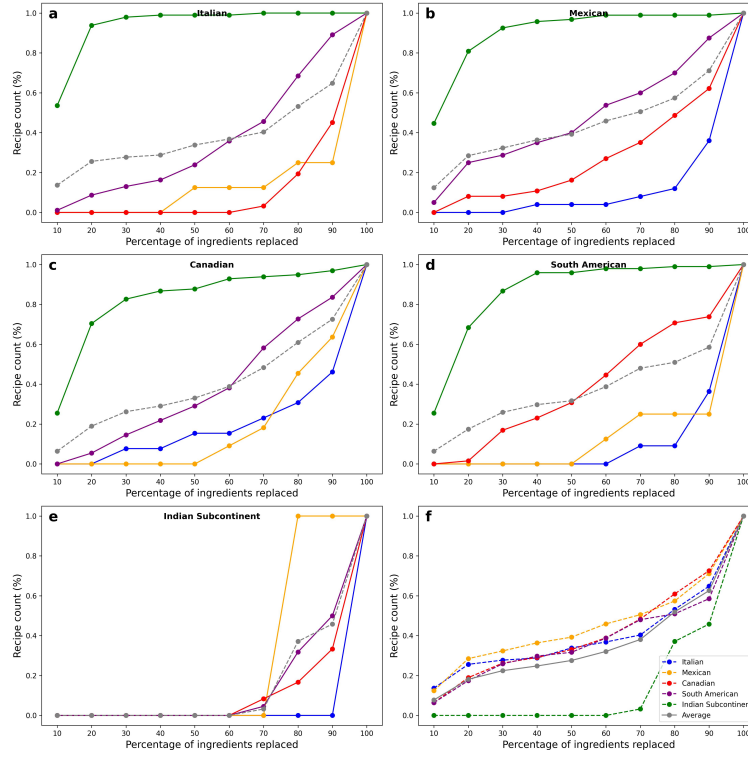

**Fig. S11.** Source Cuisine: Cumulative Percentage of Ingredients Replaced v/s Normalized Recipe Count (Mean Pooling)



**Fig. S12.** Source Cuisine: Cumulative Percentage of Ingredients Replaced v/s Normalized Recipe Count (Mean Pooling)

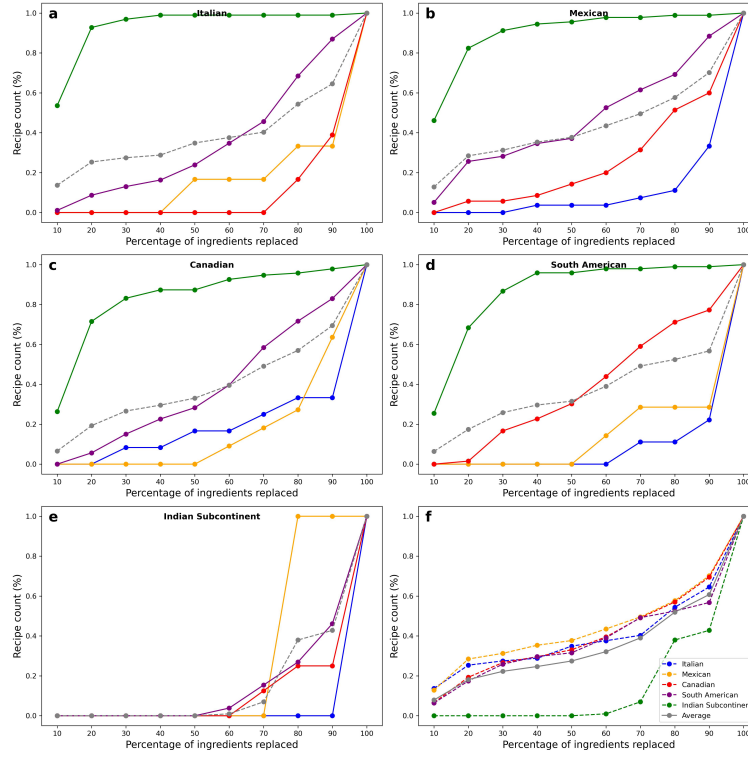

**Fig. S13.** Source Cuisine: Cumulative Percentage of Ingredients Replaced v/s Normalized Recipe Count (CLS Pooling)

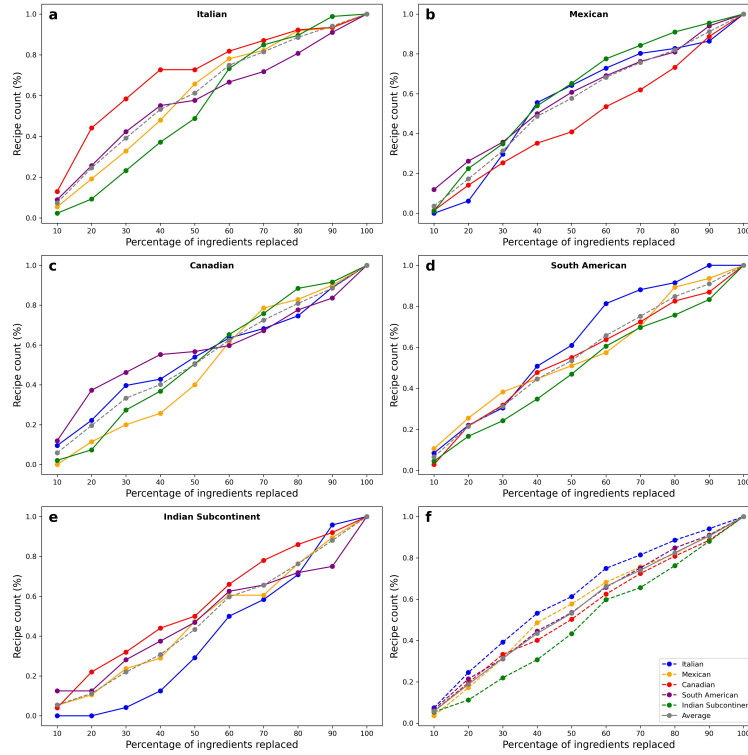

**Fig. S14.** Source Cuisine: Cumulative Percentage of Ingredients Replaced v/s Normalized Recipe Count (CLS Pooling)

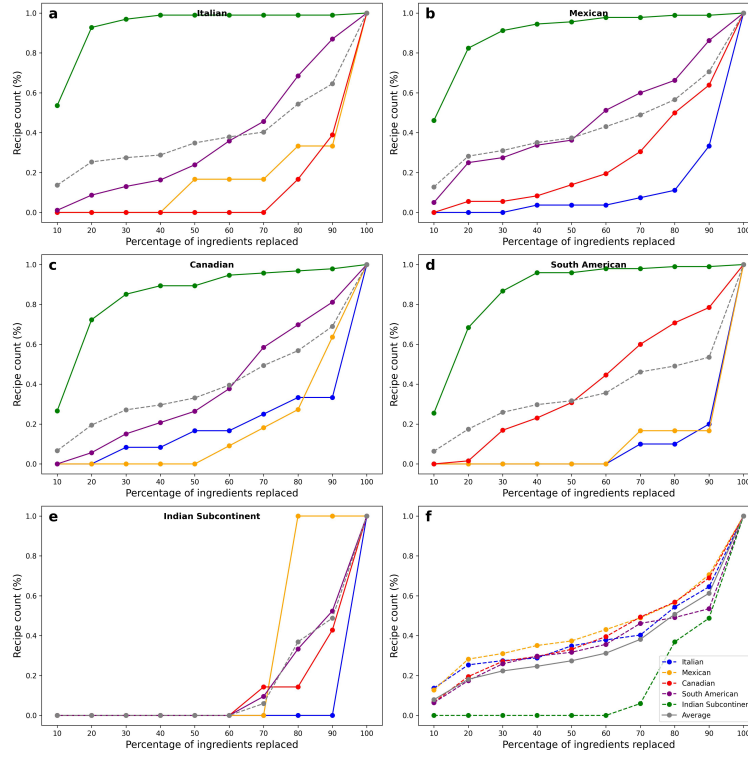

**Fig. S15.** Source Cuisine: Cumulative Percentage of Ingredients Replaced v/s Normalized Recipe Count (SBERT)

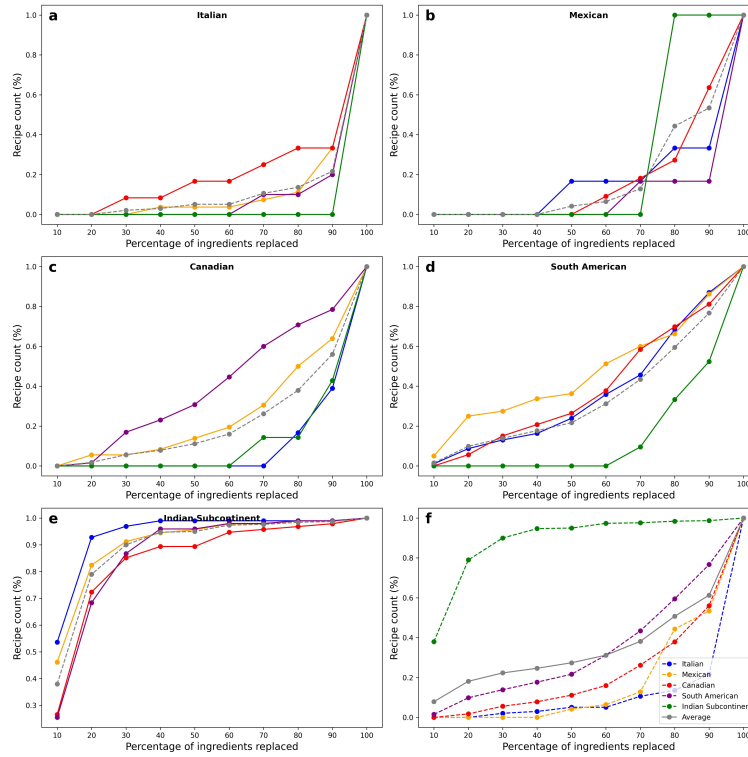

**Fig. S16.** Target Cuisine: Cumulative Percentage of Ingredients Replaced v/s Normalized Recipe Count (SBERT)

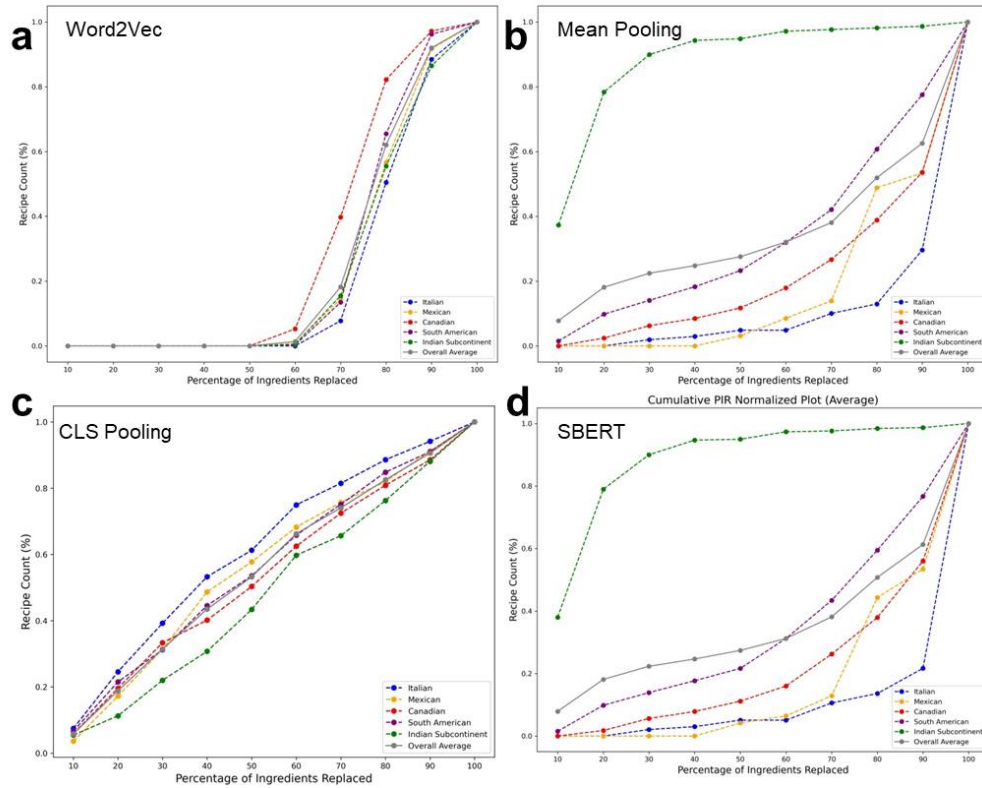

**Fig. S17.** Target Cuisine: Model wise normalized cumulative percentage of ingredients replaced
