# Supplementary material
Source: ML conference proceedings conference paper supplement (https://openreview.net/forum?id=ZxQD6oYIOm)
Supplement: supplementary_material [file attachment]

## Sheet: Sheet1
	CLS Pooling					Mean Pooling					SBERT					Ing Emb->Word2Vec(SG), Cuisine Emb-> Doc2Vec(DM)
Source	Target				Source	Target				Source	Target				Source	Target
Canadian	Indian_Subcontinent	baking_powder->baking_soda			Canadian	Indian_Subcontinent	baking_powder->baking_soda			Canadian	Indian_Subcontinent	baking_powder->baking_soda			Canadian	Indian_Subcontinent	butter->dripping
		baking_soda->baking_powder					baking_soda->baking_powder					baking_soda->baking_powder					egg->salad
		brown_sugar->dark_brown_sugar					brown_sugar->dark_brown_sugar					brown_sugar->dark_brown_sugar					brown_sugar->taco_seasoning_mix
		purpose_flour->purpose_white_flour					purpose_flour->purpose_white_flour					purpose_flour->purpose_white_flour					salt->almond_oil
		egg->egg_yolk					egg->egg_yolk					egg->egg_yolk					water->tarka
Canadian	South_American	salt->salt_pepper			Canadian	South_American	salt->salt_pepper			Canadian	South_American	salt->salt_pepper			Canadian	South_American	egg->mincemeat
		water->salt_water					water->salt_water					water->salt_water					butter->aguardiente
		onion->onion_salt					butter->garlic_butter					brown_sugar->dark_brown_sugar					salt->sub
		brown_sugar->dark_brown_sugar					brown_sugar->dark_brown_sugar					butter->garlic_butter					brown_sugar->chile_puree
		butter->garlic_butter					purpose_flour->purpose_white_flour					onion->onion_salt					baking_powder->ganache
Canadian	Mexican	salt->salt_pepper			Canadian	Mexican	salt->salt_pepper			Canadian	Mexican	salt->salt_pepper			Canadian	Mexican	butter->flan
		water->salt_water					purpose_flour->purpose_white_flour					purpose_flour->purpose_white_flour					egg->cooking_oil
		onion->onion_salt					water->hot_water					water->hot_water					brown_sugar->banana_pepper
		brown_sugar->dark_brown_sugar					white_sugar->brown_sugar					white_sugar->brown_sugar					salt->lukewarm_water
		butter->garlic_butter					baking_powder->baking_soda					baking_powder->baking_soda					purpose_flour->mezcal
Canadian	Italian	butter->butter_margarine			Canadian	Italian	onion->tomato_onion			Canadian	Italian	butter->butter_margarine			Canadian	Italian	butter->sage_sprig
		onion->tomato_onion					butter->butter_margarine					onion->tomato_onion					egg->nonfat_parmesan_cheese
		egg->egg_tomato					egg->egg_tomato					egg->egg_tomato					brown_sugar->butter_powder
		flour->bread_flour					flour->bread_flour					flour->bread_flour					salt->vanilla_gingersnap
		salt->salt_pepper					salt->salt_pepper					salt->salt_pepper					water->brine
Indian_Subcontinent	Candian	water->cold_water			Indian_Subcontinent	Candian	salt->salt_pepper			Indian_Subcontinent	Candian	salt->salt_pepper			Indian_Subcontinent	Candian	salt->white_cheese_curd
		salt->garlic_salt					water->cold_water					water->cold_water					water->trout
		vegetable_oil->vegetable_oil_cooking_spray					vegetable_oil->vegetable_oil_cooking_spray					vegetable_oil->vegetable_oil_cooking_spray					vegetable_oil->string
		onion->onion_salt					onion->onion_salt					onion->onion_salt					garam_masala->read
		ginger->ginger_marmalade					ginger->ginger_marmalade					ginger->ginger_marmalade					onion->brie
Indian_Subcontinent	South_American	salt->salt_pepper			Indian_Subcontinent	South_American	salt->salt_pepper			Indian_Subcontinent	South_American	salt->salt_pepper			Indian_Subcontinent	South_American	salt->golden_raisin
		onion->pepper_onion					onion->pepper_onion					onion->pepper_onion					vegetable_oil->crisp_bacon
		vegetable_oil->oil_vegetable					water->salt_water					vegetable_oil->vegetable_oil_olive					water->coconut_cream
		water->salt_water					garlic->garlic_salt					water->salt_water					garam_masala->anchovy
		chicken->chicken_meat					vegetable_oil->vegetable_oil_olive					chicken->chicken_meat					onion->cooking_spray
Indian_Subcontinent	Mexican	curry_powder->chili_powder			Indian_Subcontinent	Mexican	onion->tomato_onion			Indian_Subcontinent	Mexican	curry_powder->chili_powder			Indian_Subcontinent	Mexican	salt->habanero
		onion->tomato_onion					italian_seasoning->mexican_seasoning					onion->tomato_onion					water->bitter
		chicken_breast_half->chicken_breast_half_rotissiere					water->hot_water					chicken_breast_half->chicken_breast_half_rotissiere					turmeric->octopus
							garlic->garlic_salt										garam_masala->mexican_white_cheese
							parmesan_cheese->cheddar_cheese										garlic->cauliflower
Indian_Subcontinent	Italian	curry_powder->curry_paste			Indian_Subcontinent	Italian	onion->tomato_onion			Indian_Subcontinent	Italian	curry_powder->curry_paste			Indian_Subcontinent	Italian	water->mozzarella_balls
		onion->tomato_onion					basmati_rice->arborio_rice					onion->tomato_onion					turmeric->red
		butter->butter_margarine					tomato->tomato_onion					olive_oil->garlic_olive_oil					vegetable_oil->scampi
		chicken_breast_half->chicken_breast_fillet					garlic->garlic_salt					garlic->garlic_salt					garam_masala->food_coloring
		olive_oil->garlic_olive_oil					chicken_breast_half->turkey_breast_half					butter->butter_margarine					onion->lime
South_American	Candian	salt->salt_pepper			South_American	Candian	salt->salt_pepper			South_American	Candian	salt->salt_pepper			South_American	Candian	water->salt_black_pepper
		water->soda_water					water->soda_water					water->soda_water					onion->habanero
		milk->milk_cream					milk->milk_cream					milk->milk_cream					milk->lime
		onion->onion_salt					onion->onion_salt					onion->onion_salt					salt->fruit_juice
		olive_oil->virgin_olive_oil					olive_oil->virgin_olive_oil					olive_oil->virgin_olive_oil					butter->white_vermouth
South_American	Indian_Subcontinent	cachaca->tapioca			South_American	Indian_Subcontinent	cachaca->tapioca			South_American	Indian_Subcontinent	cachaca->tapioca			South_American	Indian_Subcontinent	water->tamarind_juice
		quinoa->jalapeno					quinoa->jalapeno					quinoa->jalapeno					salt->hamburger
		coconut_milk->coconut_milk_powder					coconut_milk->coconut_milk_powder					coconut_milk->coconut_milk_powder					onion->ketchup
		salt->salt_pepper					salt->salt_pepper					salt->salt_pepper					milk->tamarind
		water->salt_water					water->salt_water					water->salt_water					garlic->king
South_American	Mexican	salt->salt_pepper			South_American	Mexican	egg->egg_yolk			South_American	Mexican	salt->salt_pepper			South_American	Mexican	salt->seasoning_mix
		vanilla_extract->mexican_vanilla_extract					onion->tomato_onion					vanilla_extract->mexican_vanilla_extract					water->cooking
		purpose_flour->purpose_white_flour					water->soda_water					water->soda_water					milk->chile
		milk->milk_chocolate					salt_black_pepper->kosher_salt_black_pepper					onion->tomato_onion					onion->fajita_seasoning
		egg->egg_yolk					salt->salt_pepper					purpose_flour->purpose_white_flour					garlic->pico_de_gallo_sauce
South_American	Italian	onion->tomato_onion			South_American	Italian	salt->salt_pepper			South_American	Italian	onion->tomato_onion			South_American	Italian	water->tortiglioni_pasta
		olive_oil->oil_olive					water->salt_water					olive_oil->oil_olive					salt->biscuit
		water->salt_water					onion->tomato_onion					water->salt_water					onion->bison
		garlic->garlic_salt					olive_oil->garlic_olive_oil					garlic->garlic_salt					milk->tortellini
		parsley->parsley_sprig					butter->butter_margarine					salt->salt_pepper					garlic->lemon_pulp
Mexican	Canadian	flour_tortilla->oat_flour			Mexican	Canadian	flour_tortilla->oat_flour			Mexican	Canadian	flour_tortilla->oat_flour			Mexican	Canadian	flour_tortilla->skor_english_toffee_bit
		cilantro->citron					cilantro->citron					cilantro->citron					cheddar_cheese->horseradish_sauce
		cheddar_cheese->mozzarella_cheese					cheddar_cheese->parmesan_cheese					cheddar_cheese->mozzarella_cheese					cilantro->shrimp
		tomato->cherry_tomato					olive_oil->virgin_olive_oil					tomato->cherry_tomato					chili_powder->mango
		salt->salt_pepper					tomato->cherry_tomato					salt->salt_pepper					black_bean->wheat_tortilla
Mexican	Indian_Subcontinent	flour_tortilla->wheat_flour_tortilla			Mexican	Indian_Subcontinent	flour_tortilla->chickpea_flour			Mexican	Indian_Subcontinent	flour_tortilla->wheat_flour_tortilla			Mexican	Indian_Subcontinent	flour_tortilla->chat_masala
		corn_tortilla->corn_kernel					corn_tortilla->corn_kernel					corn_tortilla->corn_flake					cheddar_cheese->red_cherry
		salsa->hot_salsa					salsa->hot_salsa					salsa->hot_salsa					onion->bread_dough
		black_bean->green_bean					black_bean->green_bean					taco_seasoning_mix->tandoori_spice_mix					cumin->red_lentil
		mango_salsa->mango_chutney					mango_salsa->mango_chutney					black_bean->green_bean					lime_juice->ammonium_chloride
Mexican	South_American	onion->pepper_onion			Mexican	South_American	flour_tortilla->fajita_flour_tortilla			Mexican	South_American	onion->pepper_onion			Mexican	South_American	flour_tortilla->pepper_onion
		flour_tortilla->fajita_flour_tortilla					onion->pepper_onion					flour_tortilla->fajita_flour_tortilla					cumin->garlic_clove
		garlic->garlic_salt					salt->salt_pepper					garlic->garlic_salt					onion->cooking_oil
		salt->salt_pepper					cilantro->citron					salt->salt_pepper					tomato->cooking_oil
		tomato->tomato_garlic					tomato->tomato_garlic					tomato->tomato_garlic					chili_powder->marmite
Mexican	Italian	flour_tortilla->taco_flour_tortilla			Mexican	Italian	flour_tortilla->taco_flour_tortilla			Mexican	Italian	flour_tortilla->taco_flour_tortilla			Mexican	Italian	flour_tortilla->nutritional_yeast
		cheddar_cheese->mozzarella_cheddar_cheese					onion->tomato_onion					cheddar_cheese->mozzarella_cheddar_cheese					cilantro->buttermilk_dressing
		onion->tomato_onion					cheddar_cheese->mozzarella_cheese					onion->tomato_onion					cumin->coconut_oil
		tomato->tomato_onion					tomato->tomato_onion					tomato->tomato_onion					onion->roast
		monterey_jack_cheese->colby_monterey_jack_cheese					monterey_jack_cheese->colby_monterey_jack_cheese					monterey_jack_cheese->colby_monterey_jack_cheese					tomato->roast
Italian	Canadian	carrot->baby_carrot			Italian	Canadian	garlic->garlic_salt			Italian	Canadian	carrot->baby_carrot			Italian	Canadian	garlic->button_mushroom
		garlic->garlic_salt					carrot->carrot_juice					olive_oil->virgin_olive_oil					olive_oil->rosemary_oil
		onion->onion_salt					olive_oil->virgin_olive_oil					garlic->garlic_salt					parmesan_cheese->camembert_cheese
		olive_oil->virgin_olive_oil					onion->onion_salt					onion->onion_salt					basil->purpose_flour
		parmesan_cheese->cheddar_cheese					parmesan_cheese->cheddar_cheese					parmesan_cheese->cheddar_cheese					black_pepper->apricot_half
Italian	Indian_Subcontinent	parmesan_cheese->cheddar_cheese			Italian	Indian_Subcontinent	parmesan_cheese->cheddar_cheese			Italian	Indian_Subcontinent	parmesan_cheese->cheddar_cheese			Italian	Indian_Subcontinent	garlic->puri
		ditalini_pasta->orzo_pasta					ditalini_pasta->orzo_pasta					ditalini_pasta->orzo_pasta					black_pepper->green_chutney
		italian_seasoning->italian_herb_seasoning					italian_seasoning->italian_herb_seasoning					italian_seasoning->italian_herb_seasoning					parmesan_cheese->yoghurt
		basil->basil_leaf					basil->basil_leaf					basil->basil_leaf					olive_oil->chinese_salt
		cheese_tortellini->ricotta_cheese					cheese_tortellini->ricotta_cheese					cheese_tortellini->ricotta_cheese					basil->corn_flour
Italian	South_American	garlic->garlic_salt			Italian	South_American	garlic->garlic_salt			Italian	South_American	salt->salt_pepper			Italian	South_American	olive_oil->pumpkin
		olive_oil->oil_olive					olive_oil->oil_olive					onion->pepper_onion					garlic->hamburger_meat
		parmesan_cheese->cheddar_cheese					parmesan_cheese->cheddar_cheese					vegetable_oil->vegetable_oil_olive					black_pepper->paper
		black_pepper->salt_black_pepper					black_pepper->salt_black_pepper					water->salt_water					carrot->lemon_water
		basil->tomato_basil					basil->tomato_basil					chicken->chicken_meat					celery->stir_meat
Italian	Mexican	onion->tomato_onion			Italian	Mexican	onion->tomato_onion			Italian	Mexican	onion->tomato_onion			Italian	Mexican	garlic->citrus_peel
		italian_seasoning->mexican_seasoning					italian_seasoning->mexican_seasoning					italian_seasoning->mexican_seasoning					olive_oil->arrowroot_powder
		water->hot_water					water->hot_water					water->hot_water					parmesan_cheese->strawberry_puree
		spinach->spinach_tortilla					garlic->garlic_salt					spinach->spinach_tortilla					black_pepper->chocolate_chip
		black_pepper->salt_black_pepper					parmesan_cheese->cheddar_cheese					black_pepper->salt_black_pepper					basil->romaine_leaf
	Red	9				Red	8				Red	7				Red	80
	Yellow	5				Yellow	5				Yellow	3				Yellow	6
	Green	84				Green	87				Green	88				Green	14
